# Supplementary material
Source: ML conference proceedings conference paper supplement (https://proceedings.mlr.press/v119/maini20a.html)
Supplement: Supplementary file [file maini20a-supp.pdf]

## Adversarial Robustness Against the Union of Multiple Perturbation Models (Supplementary Material)

### A. Steepest descent and projections for $\ell_\infty$ , $\ell_2$ , and $\ell_1$ adversaries

In this section, we describe the steepest descent and projection steps for  $\ell_p$  adversaries for  $p \in \{\infty, 2, 1\}$ ; these are standard results, but are included for a complete description of the algorithms. Note that this differs slightly from the adversaries considered in [Schott et al. \(2019\)](#): while they used an  $\ell_0$  adversary, we opted to use an  $\ell_1$  adversary. The  $\ell_0$  ball with radius  $\epsilon$  is contained within an  $\ell_1$  ball with the same radius, so achieving robustness against an  $\ell_1$  adversary is strictly more difficult.

**$\ell_\infty$  space** The direction of steepest descent with respect to the  $\ell_\infty$  norm is

$$v_\infty(\delta) = \alpha \cdot \text{sign}(\nabla l(x + \delta; \theta)) \quad (15)$$

and the projection operator onto  $\Delta_{\infty, \epsilon}$  is

$$\mathcal{P}_{\Delta_{\infty, \epsilon}}(\delta) = \text{clip}_{[-\epsilon, \epsilon]}(\delta) \quad (16)$$

**$\ell_2$  space** The direction of steepest descent with respect to the  $\ell_2$  norm is

$$v_2(\delta) = \alpha \cdot \frac{\nabla l(x + \delta; \theta)}{\|\nabla l(x + \delta; \theta)\|_2} \quad (17)$$

and the projection operator onto the  $\ell_2$  ball around  $x$  is

$$\mathcal{P}_{\Delta_{2, \epsilon}}(\delta) = \epsilon \cdot \frac{\delta}{\max\{\epsilon, \|\delta\|_2\}} \quad (18)$$

**$\ell_1$  space** The direction of steepest descent with respect to the  $\ell_1$  norm is

$$v_1(\delta) = \alpha \cdot \text{sign}\left(\frac{\partial l(x + \delta; \theta)}{\partial \delta_{i^*}}\right) \cdot e_{i^*} \quad (19)$$

where

$$i^* = \arg \max_i |\nabla l(x + \delta; \theta)_i| \quad (20)$$

and  $e_{i^*}$  is a unit vector with a one in position  $i^*$ . Finally, the projection operator onto the  $\ell_1$  ball,

$$\mathcal{P}_{\Delta_{1, \epsilon}}(\delta) = \arg \min_{\delta': \|\delta'\|_1 \leq \epsilon} \|\delta - \delta'\|_2^2, \quad (21)$$

can be solved with [Algorithm 2](#), and we refer the reader to [Duchi et al. \(2008\)](#) for its derivation.

---

**Algorithm 2** Projection of some perturbation  $\delta \in \mathbb{R}^n$  onto the  $\ell_1$  ball with radius  $\epsilon$ . We use  $|\cdot|$  to denote element-wise absolute value.

---

**Input:** perturbation  $\delta$ , radius  $\epsilon$

Sort  $|\delta|$  into  $\gamma : \gamma_1 \geq \gamma_2 \geq \dots \geq \gamma_n$

$\rho := \max \left\{ j \in [n] : \gamma_j - \frac{1}{j} \left( \sum_{r=1}^j \gamma_r - \epsilon \right) > 0 \right\}$

$\eta := \frac{1}{\rho} \left( \sum_{i=1}^{\rho} \gamma_i - \epsilon \right)$

$z_i := \text{sign}(\delta_i) \max \{ \gamma_i - \eta, 0 \}$  for  $i = 1 \dots n$

**return**  $z$

---

#### A.1. Enhanced $\ell_1$ steepest descent step

Note that the steepest descent step for  $\ell_1$  only updates a single coordinate per step. This can be quite inefficient, as pointed out by [Tramèr & Boneh \(2019\)](#). To tackle this issue, and also empirically improve the attack success rate, [Tramèr & Boneh \(2019\)](#) instead select the top  $k$  coordinates according to Equation 20 to update. In this work, we adopt a similar but slightly modified scheme: we randomly sample  $k$  to be some integer within some range  $[k_1, k_2]$ , and update each coordinate with step size  $\alpha' = \alpha/k$ . We observe in our experimentation that the randomness induced by varying the number of coordinates aids in reducing the gradient masking problem observed by [Tramèr & Boneh \(2019\)](#).

#### A.2. Restricting the steepest descent coordinate

The steepest descent direction for both the  $\ell_0$  and  $\ell_1$  norm end up selecting a single coordinate direction to move the perturbation. However, if the perturbation is already at the boundary of pixel space (for MNIST, this is the range  $[0,1]$  for each pixel), then it's possible for the PGD adversary to get stuck in a loop trying to use the same descent direction to escape pixel space. To avoid this, we only allow the steepest descent directions for these two attacks to choose coordinates that keep the image in the range of real pixels.

## B. Extended results

Here, we show the full break down of adversarial error rates over individual attacks for both MNIST and CIFAR10.

### B.1. MNIST results

**Expanded table of results** [Table 3](#) contains break down of adversarial accuracies against all attacks for all models on the MNIST dataset. All attacks were run on a subset of the first 1000 test examples with 10 random restarts, with the exception of Boundary Attack, which by default makes 25 trials per iteration, and DDN attack, which does not benefit from restarts owing to a deterministic starting point. The results for B-ABS and ABS models are reported directly from [Schott et al. \(2019\)](#), which uses gradient estimation

Table 3: Summary of adversarial accuracy results for MNIST

|                                            | $P_\infty$ | $P_2$ | $P_1$ | B-ABS | ABS | MAX   | AVG   | MSD          |
|--------------------------------------------|------------|-------|-------|-------|-----|-------|-------|--------------|
| Clean Accuracy                             | 99.1%      | 99.2% | 99.3% | 99%   | 99% | 98.6% | 99.1% | 98.3%        |
| PGD- $\ell_\infty$                         | 90.3%      | 0.4%  | 0.0%  | -     | -   | 51.0% | 65.2% | 62.7%        |
| FGSM                                       | 94.9%      | 68.3% | 6.4%  | 85%   | 34% | 81.4% | 85.5% | 82.8%        |
| PGD-Foolbox                                | 92.1%      | 8.5%  | 0.1%  | 86%   | 13% | 65.8% | 73.5% | 69.2%        |
| MIM                                        | 92.3%      | 11.2% | 0.1%  | 85%   | 17% | 70.7% | 76.7% | 71.0%        |
| $\ell_\infty$ attacks ( $\epsilon = 0.3$ ) | 90.3%      | 0.4%  | 0.0%  | 77%   | 8%  | 51.0% | 65.2% | 62.7%        |
| PGD- $\ell_2$                              | 68.8%      | 69.2% | 38.7% | -     | -   | 64.1% | 67.9% | 70.2%        |
| PGD-Foolbox                                | 88.9%      | 77.9% | 48.7% | 63%   | 87% | 75.6% | 80.3% | 78.4%        |
| Gaussian Noise                             | 98.9%      | 98.6% | 98.9% | 89%   | 98% | 97.7% | 98.6% | 97.2%        |
| Boundary Attack                            | 18.2%      | 81.4% | 62.1% | 91%   | 83% | 73.6% | 71.8% | 72.4%        |
| DeepFool                                   | 93.0%      | 86.8% | 59.5% | 41%   | 83% | 81.7% | 87.3% | 80.7%        |
| Pointwise Attack                           | 40.6%      | 95.1% | 96.7% | 87%   | 94% | 90.8% | 85.9% | 89.6%        |
| DDN                                        | 63.9%      | 70.5% | 40.0% | -     | -   | 62.5% | 64.6% | 69.5%        |
| CWL2                                       | 79.6%      | 74.5% | 44.8% | -     | -   | 72.1% | 72.4% | 74.5%        |
| $\ell_2$ attacks ( $\epsilon = 2.0$ )      | 13.6%      | 69.2% | 38.5% | 39%   | 80% | 61.9% | 60.1% | 67.9%        |
| PGD- $\ell_1$                              | 61.8%      | 51.1% | 74.6% | -     | -   | 61.2% | 66.5% | 70.4%        |
| Salt & Pepper                              | 62.1%      | 96.4% | 97.7% | 96%   | 95% | 94.6% | 90.6% | 89.1%        |
| Pointwise Attack                           | 5.3%       | 83.3% | 89.1% | 82%   | 78% | 65.3% | 45.4% | 70.7%        |
| $\ell_1$ attacks ( $\epsilon = 10$ )       | 4.2%       | 43.4% | 70.0% | 82%   | 78% | 52.6% | 39.2% | 65.0%        |
| All attacks                                | 3.7%       | 0.4%  | 0.0%  | 39%   | 8%  | 42.1% | 34.9% | <b>58.4%</b> |

techniques whenever a gradient is needed, and the robustness against all attacks for B-ABS and ABS is an upper bound based on the reported results. Further, they used epsilon balls of radii (0.3, 1.5, 12) for ( $\ell_\infty$ ,  $\ell_2$ ,  $\ell_0$ ) adversaries. Moreover, they used an  $\ell_0$  perturbation model of a higher radius and evaluated against  $\ell_0$  attacks. So the reported number is a near estimate of the  $\ell_1$  adversarial accuracy.

## B.2. CIFAR10 results

**Expanded table of results** Table 4 contains the full table of results for all attacks on all models on the CIFAR10 dataset. All attacks were run on a subset of the first 1000 test examples with 10 random restarts, with the exception of Boundary Attack, which by default makes 25 trials per iteration, and DDN attack, which does not benefit from restarts owing to a deterministic starting point. Further note that salt & pepper and pointwise attacks in the  $\ell_1$  section are technically  $\ell_0$  attacks, but produce perturbations in the  $\ell_1$  ball. Finally, it is clear here that while the training against an  $\ell_1$  PGD adversary defends against said PGD adversary, it does not seem to transfer to robustness against other attacks.

## C. Experimental details

### C.1. Hyperparameters for PGD adversaries

In this section, we describe the parameters used for all PGD adversaries in this paper.

**MNIST** The  $\ell_\infty$  adversary used a step size  $\alpha = 0.01$  within a radius of  $\epsilon = 0.3$  for 50 iterations.

The  $\ell_2$  adversary used a step size  $\alpha = 0.1$  within a radius of  $\epsilon = 2.0$  for 100 iterations.

The  $\ell_1$  adversary used a step size of  $\alpha = 0.8$  within a radius of  $\epsilon = 10$  for 50 iterations. By default the attack is run with two restarts, once starting with  $\delta = 0$  and once by randomly initializing  $\delta$  in the allowable perturbation ball.  $k_1 = 5$ ,  $k_2 = 20$  as described in A.1.

At test time, we increase the number of iterations to (100, 200, 100) for ( $\ell_\infty$ ,  $\ell_2$ ,  $\ell_1$ ).

### CIFAR10

The  $\ell_\infty$  adversary used a step size  $\alpha = 0.003$  within a radius of  $\epsilon = 0.03$  for 40 iterations.

The  $\ell_2$  adversary used a step size  $\alpha = 0.05$  within a radius of  $\epsilon = 0.5$  for 50 iterations.

The  $\ell_1$  adversary used a step size  $\alpha = 1.0$  with  $\epsilon = 12$  for 50 iterations.  $k_1 = 5$ ,  $k_2 = 20$  as described in A.1.

At test time, we increase the number of iterations to (100, 500, 100) for ( $\ell_\infty$ ,  $\ell_2$ ,  $\ell_1$ ).

### C.2. Training hyperparameters

In this section, we describe the parameters used for adversarial training.

Table 4: Summary of adversarial accuracy results for CIFAR10

|                                             | $P_\infty$ | $P_2$ | $P_1$ | MAX   | AVG   | MSD          |
|---------------------------------------------|------------|-------|-------|-------|-------|--------------|
| Clean accuracy                              | 83.3%      | 90.2% | 73.3% | 81.0% | 84.6% | 81.1%        |
| PGD- $\ell_\infty$                          | 50.3%      | 48.4% | 29.8% | 44.9% | 42.8% | 48.0%        |
| FGSM                                        | 57.4%      | 43.4% | 12.7% | 54.9% | 51.9% | 53.7%        |
| PGD-Foolbox                                 | 52.3%      | 28.5% | 0.6%  | 48.9% | 44.6% | 53.5%        |
| MIM                                         | 52.7%      | 30.4% | 0.7%  | 49.9% | 46.1% | 50.7%        |
| $\ell_\infty$ attacks ( $\epsilon = 0.03$ ) | 50.7%      | 28.3% | 0.2%  | 44.9% | 42.5% | 48.0%        |
| PGD- $\ell_2$                               | 59.0%      | 62.1% | 28.9% | 64.1% | 66.9% | 66.6%        |
| PGD-Foolbox                                 | 61.6%      | 64.1% | 4.9%  | 65.0% | 68.0% | 68.2%        |
| Gaussian Noise                              | 82.2%      | 89.8% | 62.3% | 81.3% | 84.3% | 80.9%        |
| Boundary Attack                             | 65.5%      | 67.9% | 2.3%  | 64.4% | 69.2% | 69.4%        |
| DeepFool                                    | 62.2%      | 67.3% | 0.9%  | 64.4% | 67.4% | 66.1%        |
| Pointwise Attack                            | 80.4%      | 88.6% | 46.2% | 78.9% | 83.8% | 79.8%        |
| DDN                                         | 60.0%      | 63.5% | 0.1%  | 64.5% | 67.7% | 67.0%        |
| CWL2                                        | 62.0%      | 71.6% | 0.1%  | 66.9% | 71.5% | 64.7%        |
| $\ell_2$ attacks ( $\epsilon = 0.05$ )      | 57.3%      | 61.6% | 0.0%  | 61.7% | 65.0% | 64.3%        |
| PGD- $\ell_1$                               | 16.5%      | 49.2% | 69.1% | 39.5% | 54.0% | 53.4%        |
| Salt & Pepper                               | 63.4%      | 74.2% | 35.5% | 75.2% | 80.7% | 73.9%        |
| Pointwise Attack                            | 49.6%      | 62.4% | 8.4%  | 63.3% | 77.0% | 69.7%        |
| $\ell_1$ attacks ( $\epsilon = 12$ )        | 16.0%      | 46.6% | 7.9%  | 39.4% | 54.0% | 53.0%        |
| All attacks                                 | 15.6%      | 27.5% | 0.0%  | 34.9% | 40.6% | <b>47.0%</b> |

**MNIST** For all the models, we used the Adam optimizer without weight decay, and used a variation of the learning rate schedule from Smith (2018), which is piecewise linear from 0 to  $10^{-3}$  over the first 6 epochs, and down to 0 over the last 9 epochs.

We perform a large hyperparameter search for each of the MAX, AVG, MSD models, by training them for 15 epochs on all combinations of the following step sizes:  $\alpha_1 = \{0.75, 0.8, 1.0, 2.0\}$ ,  $\alpha_2 = \{0.1, 0.2\}$ ,  $\alpha_\infty = \{0.01, 0.02, 0.03\}$ . Also, we find that setting the maximum value of learning rate to  $10^{-3}$  works best among other values that we experiment on.

The MSD adversary used step sizes of  $\alpha = (0.01, 0.1, 0.8)$  for the  $(\ell_\infty, \ell_2, \ell_1)$  directions within a radius of  $\epsilon = (0.3, 2.0, 10)$  for 100 iterations.

The MAX approach used step sizes of  $\alpha = (0.01, 0.1, 1.0)$  for the  $(\ell_\infty, \ell_2, \ell_1)$  directions within a radius of  $\epsilon = (0.3, 2.0, 12)$  for (50, 100, 100) iterations respectively. We had to make an early stop at the end of the fourth epoch, since further training made the model biased towards  $\ell_\infty$  robustness. We also had to increase the number of restarts and attack iterations for the  $\ell_1$  PGD attack.

The AVG approach used step sizes of  $\alpha = (0.01, 0.2, 1.0)$  for the  $(\ell_\infty, \ell_2, \ell_1)$  directions within a radius of  $\epsilon = (0.3, 2.0, 12)$  for (50, 100, 50) iterations respectively. Note that we had to change the perturbation model for the  $\ell_1$  adversary to make it relatively stronger in-order to “balance”

the trade-offs between different perturbation models.

Finally, we train the standard  $P_1, P_2, P_\infty$  models for an extended period till 20 epochs with respective step sizes  $\alpha_1 = 1.0, \alpha_2 = 0.1$ , and  $\alpha_\infty = 0.01$ .

**CIFAR10** For all the models, we used the SGD optimizer with momentum 0.9 and weight decay  $5 \cdot 10^{-4}$ . We used a variation of the learning rate schedule from Smith (2018) to achieve superconvergence in 50 epochs, which is piecewise linear from 0 to 0.1 over the first 20 epochs, down to 0.005 over the next 20 epochs, and finally back down to 0 in the last 10 epochs.

The MSD adversary used step sizes of  $\alpha = (0.003, 0.02, 1.0)$  for the  $(\ell_\infty, \ell_2, \ell_1)$  directions within a radius of  $\epsilon = (0.03, 0.5, 12)$  for 50 iterations.

The MAX adversary used step sizes of  $\alpha = (0.005, 0.05, 1.0)$  for the  $(\ell_\infty, \ell_2, \ell_1)$  directions within a radius of  $\epsilon = (0.03, 0.3, 12)$  for (40, 50, 50) iterations respectively. We do an early stop at epoch 45 for best accuracy.

The AVG adversary used step sizes of  $\alpha = (0.003, 0.05, 1.0)$  for the  $(\ell_\infty, \ell_2, \ell_1)$  directions within a radius of  $\epsilon = (0.03, 0.3, 12)$  for (40, 50, 50) iterations respectively.

**Note:** For obtaining the best-performing MAX and AVG models, we artificially balance the size of the  $\ell_2$  perturbation region, reducing its radius to 0.3 from the actual threat model of radius 0.5.

Table 5: Comparison with Tramèr &amp; Boneh (2019) on MNIST (higher is better). Results for all models except MSD are taken as is from Tramèr &amp; Boneh (2019)

|                                            | Vanilla | $Adv_\infty$ | $Adv_1$ | $Adv_2$ | $Adv_{AVG}$ | $Adv_{MAX}$ | <b>MSD</b>   |
|--------------------------------------------|---------|--------------|---------|---------|-------------|-------------|--------------|
| Clean accuracy                             | 99.4%   | 99.1%        | 98.9%   | 98.5%   | 97.3%       | 97.2%       | 98.3%        |
| $\ell_\infty$ attacks ( $\epsilon = 0.3$ ) | 0.0%    | 91.1%        | 0.0%    | 0.4%    | 76.7%       | 71.7%       | 75.9%        |
| $\ell_2$ attacks ( $\epsilon = 2.0$ )      | 12.4%   | 12.1%        | 50.6%   | 71.8%   | 58.3%       | 56.0%       | 67.9%        |
| $\ell_1$ attacks ( $\epsilon = 10$ )       | 8.5%    | 11.3%        | 78.5%   | 68.0%   | 53.9%       | 62.6%       | 74.8%        |
| All attacks                                | 0.0%    | 6.8%         | 0.0%    | 0.4%    | 49.9%       | 52.4%       | <b>65.2%</b> |

Table 6: Comparison with Tramèr &amp; Boneh (2019) on CIFAR10 (higher is better). Results for all models except MSD are taken as is from (Tramèr &amp; Boneh, 2019)

|                                                      | Vanilla | $Adv_\infty$ | $Adv_1$ | $Adv_{AVG}$ | $Adv_{MAX}$ | <b>MSD</b>   |
|------------------------------------------------------|---------|--------------|---------|-------------|-------------|--------------|
| Clean accuracy                                       | 95.7%   | 92.0%        | 90.8%   | 91.1%       | 91.2%       | 92.0%        |
| $\ell_\infty$ attacks ( $\epsilon = \frac{4}{255}$ ) | 0.0%    | 71.0%        | 53.4%   | 64.1%       | 65.7%       | 66.8%        |
| $\ell_1$ attacks ( $\epsilon = \frac{2000}{255}$ )   | 0.0%    | 16.4%        | 66.2%   | 60.8%       | 62.5%       | 65.3%        |
| All attacks                                          | 0.0%    | 16.4%        | 53.1%   | 59.4%       | 61.1%       | <b>63.2%</b> |

#### D. Comparison with Tramèr & Boneh (2019)

In this section, we compare the results of our trained MSD model with that of Tramèr & Boneh (2019), who study the theoretical and empirical trade-offs of adversarial robustness in various settings when defending against multiple adversaries. Training methods presented by them in their comparisons, namely  $Adv_{AVG}$  and  $Adv_{MAX}$  closely resemble the simpler approaches discussed in this paper: AVG and MAX respectively. We use the results as is from their work, and additionally compare the position of our MSD models at the revised thresholds used by Tramèr & Boneh (2019). We make our best attempt at replicating the same attack strengths as of those used in the evaluation in Tramèr & Boneh (2019). We use all attacks from the Foolbox library, apart from the PGD  $\ell_1$  or SLIDE attack (Tramèr & Boneh, 2019). Further, we do not make multiple random restarts for these comparisons, which is in line with their evaluation.

The results of Tables 5 and 6 show that the relative advantage of MSD over simpler techniques does hold up. The MSD model was not retrained for the comparison on the MNIST dataset since it was trained to be robust to the same perturbation region in the main paper as well.

In case of CIFAR10, we train a model using the WideResNet architecture (Zagoruyko & Komodakis, 2016) with 5 residual blocks and a widening factor of 10, as used by Tramèr & Boneh (2019). It may be noted that this model has 4 times more parameters than the pre-activation version of ResNet which was used for the comparisons in the main paper. Further, for the CIFAR10 results in Table 6, the models are trained and tested only for  $\ell_\infty$  and  $\ell_1$  adversarial perturbations with  $\epsilon = (\frac{4}{255}, \frac{2000}{255}) \sim (0.0157, 7.84)$ . Note that the size of the perturbation regions considered in the main paper is strictly larger than these perturbation regions.

We emphasize that the evaluation method adopted in the main paper is stronger than that in this comparison. This may also be noted from the results in Table 5, where the same MSD model (without retraining) achieves nearly 7% higher accuracy of 65.2% against all attacks that were considered by Tramèr & Boneh (2019), while the same model achieved an overall robust accuracy of 58.4% in our evaluation in Table 1 in the main paper. These differences can be largely attributed to:

1. **Use of random restarts:** We observe in our experiments that using up to 10 restarts for all our attacks leads to a decrease in model accuracy from 5 to 10% across all models. Tramèr & Boneh do not mention restarting their attacks for these models and so the robust accuracies for their models in Tables 5, 6 could potentially be lowered with random restarts.
2. **Larger Suite of Attacks Used:** The attacks used by Tramèr & Boneh in case of the CIFAR10 dataset are PGD, EAD (Chen et al., 2017) and Pointwise Attack (Schott et al., 2019) for  $\ell_1$ ; PGD, C&W (Carlini & Wagner, 2017) and Boundary Attack (Brendel et al., 2017) for  $\ell_2$ ; and PGD for  $\ell_\infty$ . We use a more expansive suite of attacks as shown in Appendix B. Some attacks like DDN, which proved to be strong adversaries in most cases, were not considered by them.

Our observations re-emphasize the importance of performing multiple restarts and using a broad suite of attacks in order to be able to best determine the robust performance of a proposed algorithm.

## E. Analyzing learned Filters for MNIST

As described in § 5.1, we use a simple 4 layer CNN model to classify MNIST digits. Each of the two convolutional layers has 5x5 filters. Specifically, the first layer contains 32 such filters. We begin our analysis by observing the learned filters of an  $\ell_\infty$  robust model. We observe that many of the learned filters are extremely sparse with only one non-zero element as shown in Figure 6a. Interestingly, such a view is unique to the case of the  $\ell_\infty$  robust model and is not observed in  $\ell_2$  (Figure 6b) and  $\ell_1$  (Figure 6c) robust models.

The presence of such learned filters that act as thresholding filters, due to the immediately followed activation layer, has been hypothesized to be the reason for gradient masking in such models by Madry et al. (2018); Tramèr & Boneh (2019). The hypothesis is in line with our experimental correlations of  $\ell_\infty$  model being the only standard model that performs poorly against decision-based adversaries while being significantly robust to first-order adversaries. Therefore, we go beyond this preliminary analysis to observe the initial layers of MSD (Figures 7a, 7b), MAX (Figures 8a, 8b), AVG (Figures 9a, 9b) models. In all the three cases, we have two models that are almost identically trained, but with different  $\ell_\infty$  step sizes:  $\alpha_\infty = 0.01$  on the left and  $\alpha_\infty = 0.03$  on the right. While we display results only on two extreme settings of relative attack step-sizes, we find that changing the relative step size of different PGD adversaries can help reduce the number of thresholding filters in the MSD approach, which also leads to better accuracies against decision-based attacks like the Pointwise Attack. However, the MAX and AVG models are nearly invariant to the individual attack step-sizes.

As a result, in order to achieve reasonable performance in case of MAX and AVG models against decision-based attacks, we had to employ methods to manipulate the perturbation models in an ‘ad-hoc’ manner. More specifically, in case of MAX we had to increase the number of restarts of the  $\ell_1$  attack during training, and perform an early stop at the end of the fourth epoch (Figure 10a) since further training biased the model towards  $\ell_\infty$  robustness, and made it susceptible to decision-based attacks. In case of AVG, we had to increase the maximum radius of the  $\ell_1$  attack to 12 (Figure 10b). It is worth noting that both the approaches help cosmetically strengthen the relative effect of the  $\ell_1$  attack and help reduce the number of sparse filters. We observe that these models perform significantly better against decision-based attacks as opposed to those in Figures 8, 9.

Finally, we emphasize that while learning sparse convolution filters and the susceptibility to gradient-free attacks is often correlated, there is *no* consistent relation between the ‘‘number’’ of such filters and the final model performance or the presence of gradient masking. We perform this empirical analysis for completeness to follow up on previous

Table 7: Performance on CIFAR-10-C

|                | Accuracy |
|----------------|----------|
| Standard model | 66.0%    |
| $P_\infty$     | 75.0%    |
| $P_2$          | 82.7%    |
| $P_1$          | 57.8%    |
| MAX            | 70.8%    |
| AVG            | 76.8%    |
| MSD            | 74.2%    |

work by Madry et al. (2018), and it comes with no formal statements. In fact, a model may perform better against decision-based attacks even if it has more sparse filters than another model. We hope that these preliminary observations encourage further exploration around the phenomenon of gradient masking in adversarially robust models.

## F. Attacks outside the perturbation model

In this section, we present some additional experiments exploring the performance of our model on attacks which lie outside the perturbation model. Note that this is presented only for exploratory reasons and there is no principled reason why the adversarial defenses should generalize beyond the perturbation model defended against.

**Common corruptions** We measure the performance of all the models on CIFAR-10-C, which is a CIFAR10 benchmark which has had common corruptions applied to it (e.g. noise, blur, and compression). We report the results in Table 7. We find that that, apart from the  $P_1$  model, the rest achieve some improved robustness against these common corruptions above the standard CIFAR10 model.

**Defending against  $\ell_1$  and  $\ell_\infty$  and evaluating on  $\ell_2$**  We also briefly study what happens when one trains against  $\ell_1$  and  $\ell_\infty$  perturbation models, while evaluating against the  $\ell_2$  adversary. Specifically, we take the MSD approach on MNIST and simply remove the  $\ell_2$  adversary from the perturbation model. This results in a model which has its  $\ell_1$  and  $\ell_\infty$  robust performance against a PGD adversary drop by 1% and its  $\ell_2$  robust performance against a PGD adversary (which it was not trained for) drops by 2% in comparison to the original MSD approach on all three perturbation models.

As a result, we empirically observe that including the  $\ell_2$  perturbation model in this setting actually improved overall robustness against all three perturbation models. Unsurprisingly, the  $\ell_2$  performance drops to some degree, but the model does not lose all of its robustness.

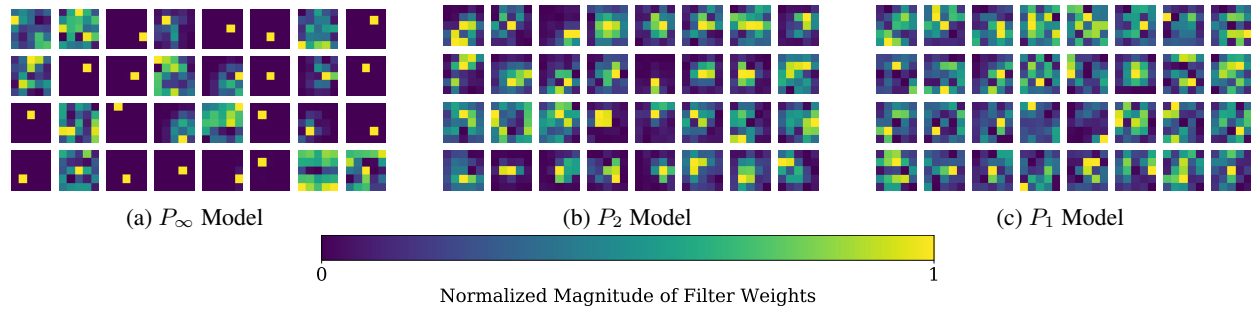

Figure 6: A view of each of the  $(5 \times 5)$  learned filters of the first layer of  $P_\infty$ ,  $P_2$ ,  $P_1$  models trained on the MNIST dataset. While there are many learned filters in the  $P_\infty$  model that have only one non-zero element (rest of the values are nearly zero), such a phenomenon is absent in  $P_2$ ,  $P_1$  models.

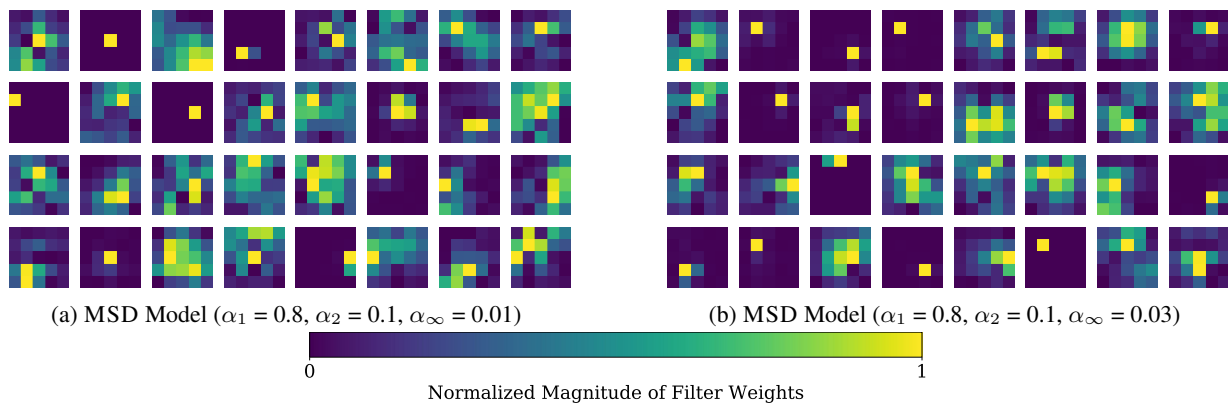

Figure 7: A view of each of the  $(5 \times 5)$  learned filters of the first layer of MSD models trained on the MNIST dataset. The training hyper-parameters for the left and right images only differ in the step-size for the  $\ell_\infty$  attack, where  $\alpha_\infty = 0.01$  for the left and  $\alpha_\infty = 0.03$  for the right image. The figure suggests how adjusting the relative step-sizes can help reduce the occurrence of sparse filters in case of MSD models.

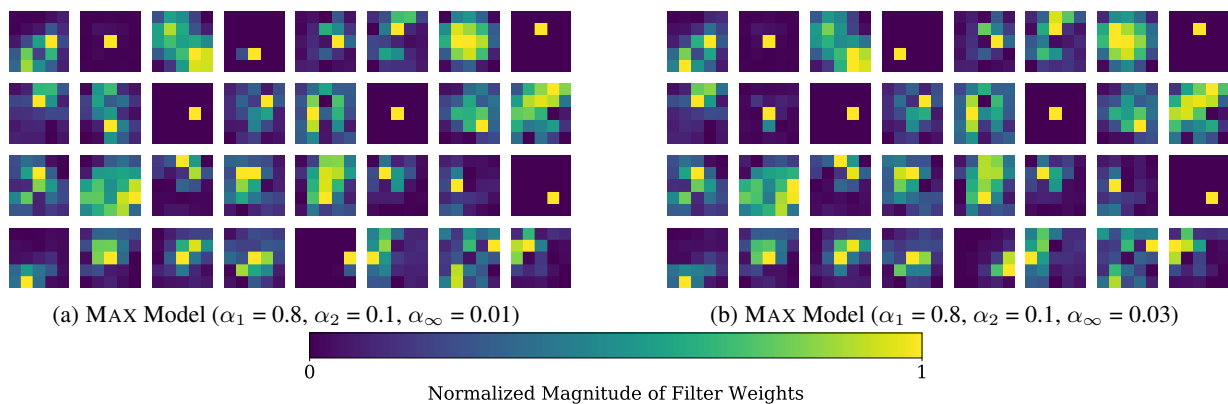

Figure 8: A view of each of the  $(5 \times 5)$  learned filters of the first layer of MAX models trained on the MNIST dataset. The training hyper-parameters for the left and right images only differ in the step-size for the  $\ell_\infty$  attack, where  $\alpha_\infty = 0.01$  for the left and  $\alpha_\infty = 0.03$  for the right image. The learned filters are nearly identical for both models and indicate how there may not be a natural way of balancing the trade-offs between different perturbation models in the training schedule for MAX models.

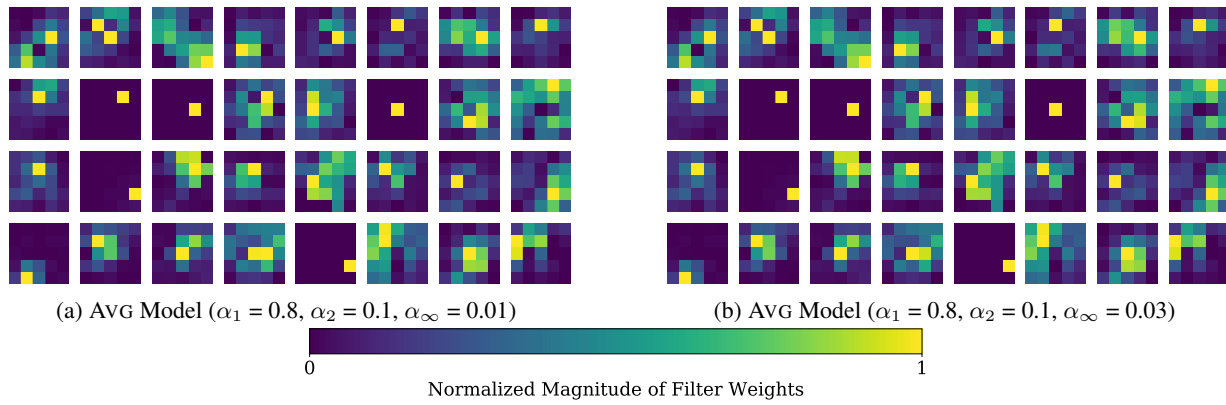

Figure 9: A view of each of the (5x5) learned filters of the first layer of AVG models trained on the MNIST dataset. The training hyper-parameters for the left and right images only differ in the step-size for the  $\ell_\infty$  attack, where  $\alpha_\infty = 0.01$  for the left and  $\alpha_\infty = 0.03$  for the right image. The learned filters are nearly identical for both models and indicate how there may not be a natural way of balancing the trade-offs between different perturbation models in the training schedule for AVG models.

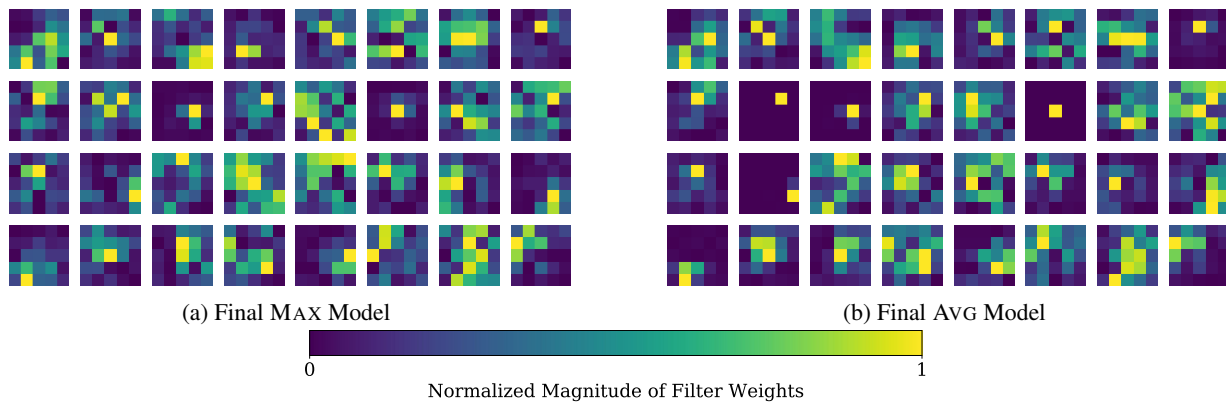

Figure 10: A view of each of the (5x5) learned filters of the first layer of MAX and AVG models trained on the MNIST dataset. These models are not susceptible to decision-based attacks as opposed to those in Figures 8, 9. Notably, we had to employ ‘ad-hoc’ techniques to manipulate the individual perturbation models to be able to train these models. However, even after such manipulations, the accuracy against the worst-case adversary in the union of  $\ell_\infty, \ell_2, \ell_1$  perturbation models for MAX, AVG approaches is considerably worse than the MSD approach.
